# Supplementary material for: Enhanced bacterial disinfection by CuI–BiOI/rGO hydrogel under visible light irradiation
Source: Royal Society of Chemistry journal article supplement (doi:10.1039/d1ra02966e), 2021-01-01
Supplement: d1ra02966e1.pdf [file d1ra02966e1.pdf]

## Supporting information

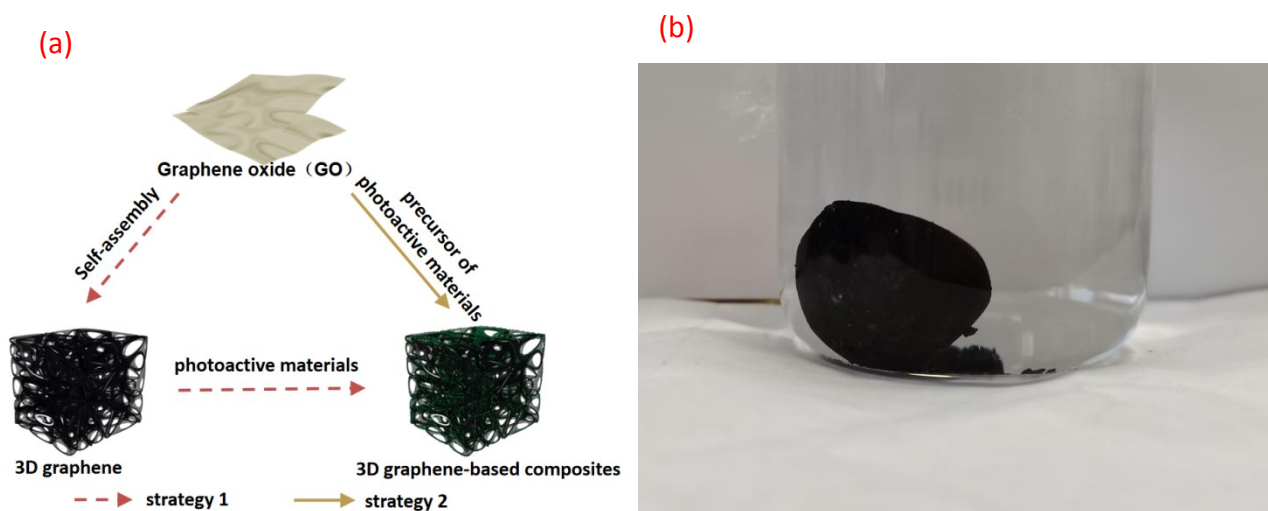

**Figure S1.** (a) Two strategies for graphene oxide synthesis of 3D graphene-based composites; (b) photograph of CuI-BiOI/rGO hydrogel

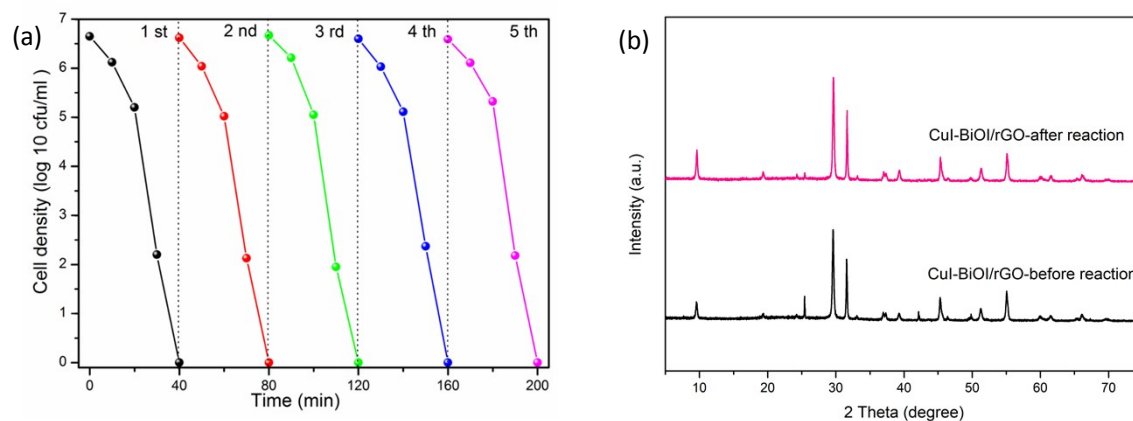

**Figure S2.** (a) Five cycling experiment in the disinfection performance with CuI-BiOI/rGO hydrogel under visible light irradiation and (b) XRD spectra before and after antibacterial reaction of CuI-BiOI/rGO hydrogel

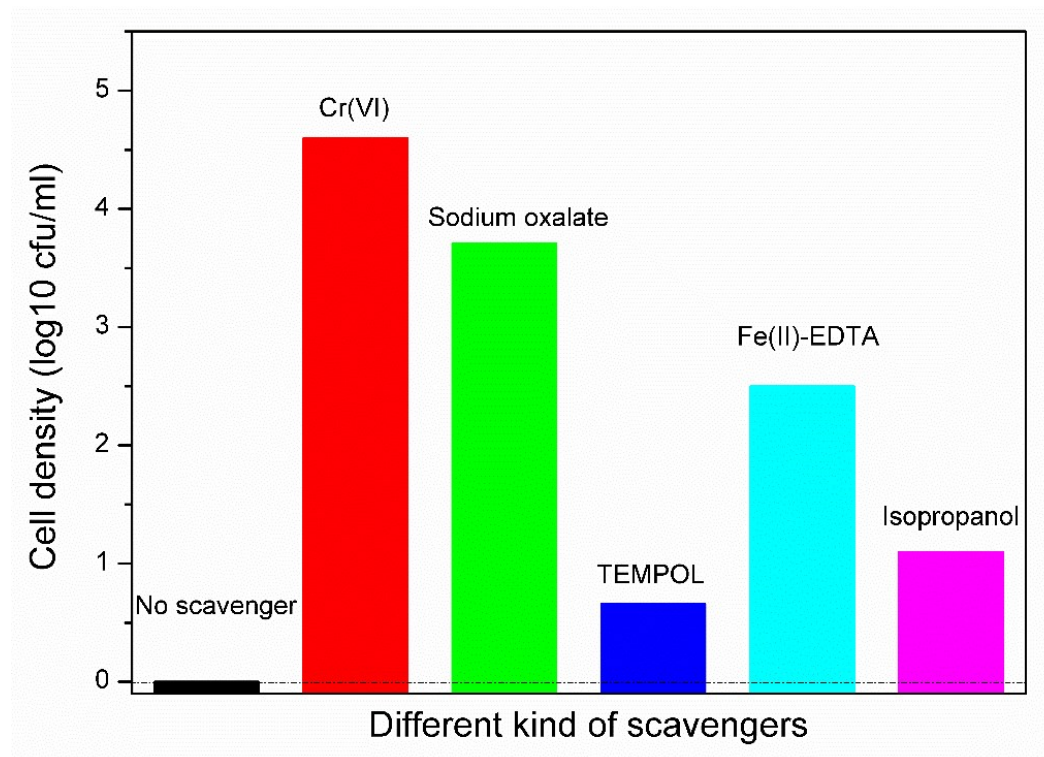

**Figure. S3.** Photocatalytic inactivation efficiency against *E. coli* K-12 ( $10^{6.5}$  cfu/mL) with different scavengers (0.5 mM sodium oxalate, 0.5 mM isopropanol, 0.05 mM Cr(VI), 2 mM TEMPOL and 0.1 mM Fe(II)–EDTA) in the presence of CuI–BiOI/rGO hydrogel under visible light irradiation.

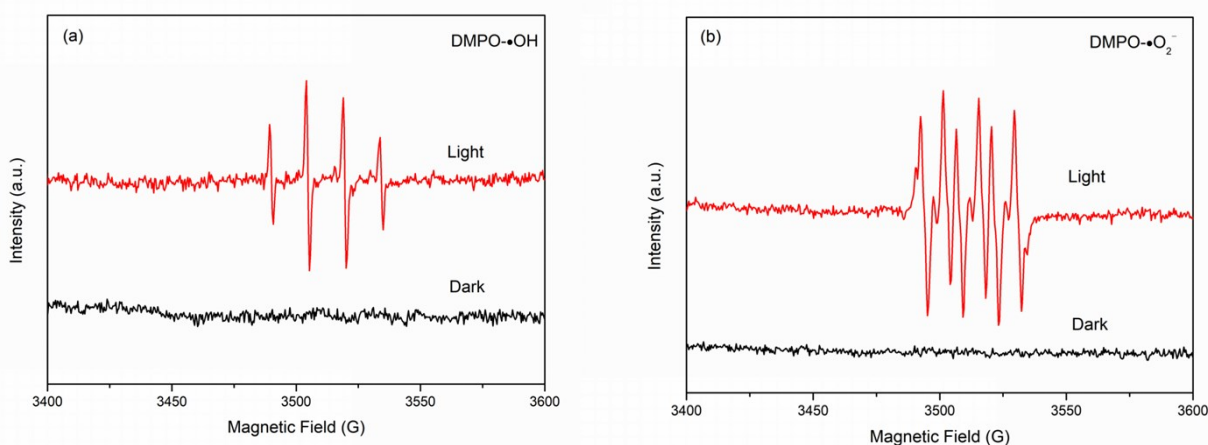

**Figure S4.** ESR spectra of: (a) DMPO-•OH adducts in aqueous suspension and (b) DMPO-•O<sub>2</sub><sup>-</sup> adducts in methanol suspension under visible irradiation and dark conditions in CuI–BiOI/rGO hydrogel

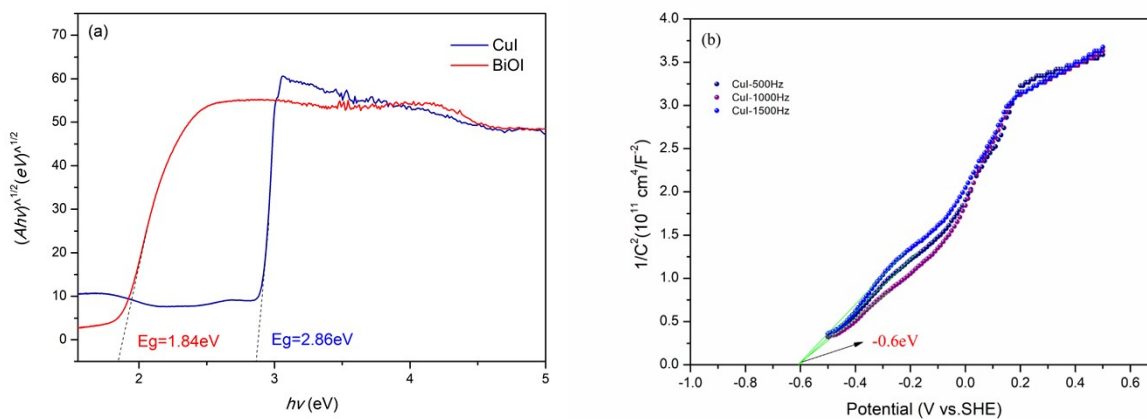

**Figure S5.** (a) Band gap energy spectra of CuI and BiOI and (b) Mott Schottky curve of CuI

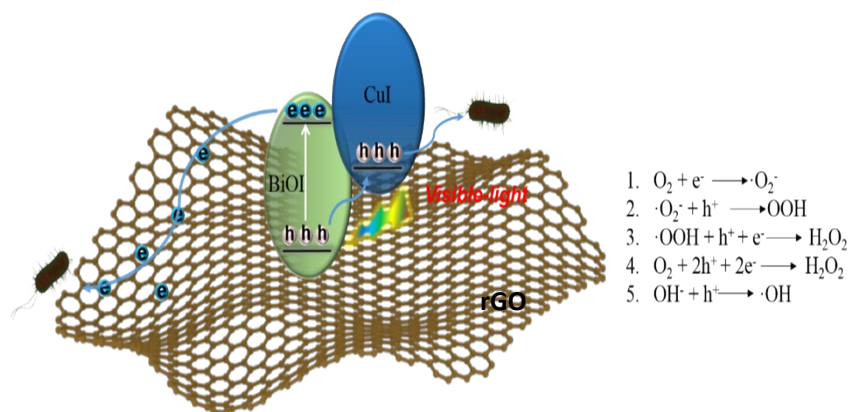

**Figure S6.** Schematic drawing of the photocatalytic antibacterial process of CuI-BiOI/rGO hydrogel
